# Supplementary material
Source: Elsevier journal article supplement (https://www.sciencedirect.com/science/article/pii/S0212656714001474)
Supplement: mmc1 [file S0212656714001474:mmc1.pdf]

|      |          |                  |       |
|------|----------|------------------|-------|
| Sexo | Admisión | 0,23 (0,08-0,67) | 0,007 |
|      | Mujer    | 1                | -     |
|      | Hombre   | 1,98 (1,17-3,35) | 0,010 |

\* OR (odds ratio) ajustadas mediante regresión logística ( $R^2$  Nagelkerke=0,076).

IC95%: intervalo de confianza al 95%

**Anexo 1. [o bien como “material adicional en internet” a criterio del Comité de Redacción]. Cuestionario sobre autonomía clínica y de gestión para los centros de salud de Mallorca**

**Conocimientos**

Sus conocimientos sobre autogestión en atención primaria cree que son...

|           |   |   |   |   |               |
|-----------|---|---|---|---|---------------|
| 0 (nulos) | 1 | 2 | 3 | 4 | 5 (muy altos) |
|           |   |   |   |   |               |

**Competencias de un centro autogestionado**

A continuación se efectúan una serie de preguntas relacionadas con la autonomía de gestión (autogestión) entendida como *“una opción organizativa en la que los profesionales asumen la plena capacidad y responsabilidad jurídica para gestionar los recursos de manera autónoma, aceptando el riesgo de una trayectoria deficiente”* (Artells JJ, Andrés J. Perfil, actitudes, valores y expectativas de los profesionales de la atención primaria en el siglo XXI. Cuadernos de Gestión. 1999;5:58-64).

Seguidamente indicamos algunas de las competencias o capacidades que podría tener un centro de atención primaria autogestionado. Señale la importancia que, según Ud., tendría cada uno de los siguientes aspectos.

| Competencia o capacidad                                           | Importancia |   |   |   |   |            |
|-------------------------------------------------------------------|-------------|---|---|---|---|------------|
|                                                                   | 0 (nula)    | 1 | 2 | 3 | 4 | 5 (máxima) |
| Selección del personal del centro                                 |             |   |   |   |   |            |
| Generación de ingresos propios *                                  |             |   |   |   |   |            |
| Gestión de los incentivos para los profesionales del centro       |             |   |   |   |   |            |
| Homogeneización de las actuaciones clínicas **                    |             |   |   |   |   |            |
| Aumento de la oferta de servicios del centro de salud             |             |   |   |   |   |            |
| Incremento de la capacidad de organización interna del centro *** |             |   |   |   |   |            |
| Capacidad de elección del hospital de referencia ****             |             |   |   |   |   |            |

\* *Generación de ingresos propios: supone la posibilidad de obtener otros ingresos además del presupuesto asignado (atención a terceros, plus de servicios, venta de servicios a otros centros de salud...)*

\*\* *Homogeneización de las actuaciones clínicas: implica el uso de protocolos o guía clínicas consensuadas para disminuir la variabilidad inadecuada de las actuaciones clínicas.*

\*\*\* *Incremento de la capacidad de organización interna del centro: supone la posibilidad de flexibilizar y adaptar turnos, horarios, tareas, agendas, etc. según las características e intereses de los profesionales del equipo, sin menoscabo de las necesidades del servicio o de los acuerdos internos del centro.*

\*\*\*\* *Capacidad de elección del hospital de referencia: supone la posibilidad de elección de servicios u hospital, fundamentalmente para derivaciones desde el centro de salud (interconsultas con especialistas hospitalarios, pruebas complementarias -radiología...-).*

## Escenarios futuros de un centro autogestionado

A continuación señalamos algunas situaciones que se podrían producir en un futuro centro autogestionado (escenarios posibles). Señale el grado de acuerdo o desacuerdo con las siguientes afirmaciones.

| Situación posible<br>(perspectiva)                                                                           | Grado de acuerdo / desacuerdo |   |   |   |   |                              |
|--------------------------------------------------------------------------------------------------------------|-------------------------------|---|---|---|---|------------------------------|
|                                                                                                              | 0 (en total<br>desacuerdo)    | 1 | 2 | 3 | 4 | 5 (totalmente<br>de acuerdo) |
| Los centros autogestionados cumplirán con el presupuesto asignado (no generarán déficit)                     |                               |   |   |   |   |                              |
| Los centros autogestionados serán más eficientes *                                                           |                               |   |   |   |   |                              |
| Los profesionales trabajarán menos horas                                                                     |                               |   |   |   |   |                              |
| Los trabajadores estarán más implicados y motivados                                                          |                               |   |   |   |   |                              |
| Los profesionales tendrán mayores ingresos                                                                   |                               |   |   |   |   |                              |
| Los profesionales perderán estabilidad laboral                                                               |                               |   |   |   |   |                              |
| Existirá una mejor conciliación de la vida laboral y personal-familiar                                       |                               |   |   |   |   |                              |
| Existirán mayores desigualdades (inequidades) en la atención a la población **                               |                               |   |   |   |   |                              |
| Mejorará la calidad de la atención                                                                           |                               |   |   |   |   |                              |
| Mejorará la accesibilidad de la población al centro ***                                                      |                               |   |   |   |   |                              |
| Existirá una mejor formación (desarrollo profesional) de los trabajadores                                    |                               |   |   |   |   |                              |
| Se potenciará la investigación del centro de salud                                                           |                               |   |   |   |   |                              |
| El proceso de autogestión supondrá un paso hacia la privatización de los centros                             |                               |   |   |   |   |                              |
| A medio plazo (antes de 3 años) estarán implantados centros de atención primaria autogestionados en Mallorca |                               |   |   |   |   |                              |

\* Obtendrán mejores resultados por un mejor uso de los recursos.

\*\* Desigualdades (inequidad): entendidas como diferencias en el acceso a los servicios del centro, una distinta oferta de los servicios o de su calidad, según el centro donde sea atendido el paciente.

\*\*\* Accesibilidad: mayor oferta (amplitud) horaria, menores esperas, mayor facilidad en la obtención de cita...

### Impacto de los centros autogestionados

La puesta en marcha de centros de salud autogestionados, según Ud., ¿qué impacto tendría para cada uno de los siguientes grupos implicados?

| Grupo implicado                          | Grado de impacto |   |   |   |   |                  |
|------------------------------------------|------------------|---|---|---|---|------------------|
|                                          | 0 (nulo)         | 1 | 2 | 3 | 4 | 5 (muy positivo) |
| Médicos de atención primaria             |                  |   |   |   |   |                  |
| Enfermeras de atención primaria          |                  |   |   |   |   |                  |
| Personal de Admisión                     |                  |   |   |   |   |                  |
| Otros profesionales de atención primaria |                  |   |   |   |   |                  |
| Ciudadanos                               |                  |   |   |   |   |                  |
| Gestores - directivos                    |                  |   |   |   |   |                  |
| Políticos                                |                  |   |   |   |   |                  |

¿Qué impacto para la mejora de la atención primaria de Mallorca tendría la puesta en marcha de centros autogestionados?

| 0 (nulo) | 1 | 2 | 3 | 4 | 5 (muy positivo) |
|----------|---|---|---|---|------------------|
|          |   |   |   |   |                  |

### Requisitos para la autogestión. Importancia

A continuación señalamos algunos de los requisitos o necesidades para poder poner en marcha un centro autogestionado. Señale la importancia que Ud. da a cada uno de ellos para poder avanzar hacia la autogestión.

| Requisitos o necesidades | Importancia |   |   |   |   |   |
|--------------------------|-------------|---|---|---|---|---|
|                          | 0           | 1 | 2 | 3 | 4 | 5 |
|                          |             |   |   |   |   |   |

|                                                                                                                      | (nula) |  |  |  |  | (máxima) |
|----------------------------------------------------------------------------------------------------------------------|--------|--|--|--|--|----------|
| Modificar el marco jurídico y normativo                                                                              |        |  |  |  |  |          |
| Superar la resistencia al cambio de los profesionales                                                                |        |  |  |  |  |          |
| Contar con sistemas de información e indicadores adecuados                                                           |        |  |  |  |  |          |
| Contar con contratos de gestión adecuados                                                                            |        |  |  |  |  |          |
| Disponer de evaluaciones de experiencias previas de autogestión en atención primaria (de otras comunidades o países) |        |  |  |  |  |          |
| Contar con un sistema de asignación y seguimiento presupuestario adecuado                                            |        |  |  |  |  |          |
| Alcanzar un pacto de todos los partidos políticos respecto a la autogestión                                          |        |  |  |  |  |          |
| Contar con coordinadores del centro de salud capacitados                                                             |        |  |  |  |  |          |
| Contar con directivos de la administración sanitaria (GAP, IB-Salut...) capacitados                                  |        |  |  |  |  |          |

### Requisitos para la autogestión. Factibilidad

Respecto a los mismos aspectos de la pregunta anterior (requisitos para la autogestión), señale la facilidad o dificultad (factibilidad) que, según Ud., tendría conseguir o modificar cada uno de los siguientes requisitos.

| Requisitos o necesidades                                                                                        | Facilidad o dificultad (factibilidad) para el cambio |   |   |   |   |                  |
|-----------------------------------------------------------------------------------------------------------------|------------------------------------------------------|---|---|---|---|------------------|
|                                                                                                                 | 0<br>(imposible)                                     | 1 | 2 | 3 | 4 | 5<br>(muy fácil) |
| Modificar el marco jurídico y normativo                                                                         |                                                      |   |   |   |   |                  |
| Superar la resistencia al cambio de los profesionales                                                           |                                                      |   |   |   |   |                  |
| Contar con sistemas de información e indicadores adecuados                                                      |                                                      |   |   |   |   |                  |
| Contar con contratos de gestión adecuados                                                                       |                                                      |   |   |   |   |                  |
| Disponer de evaluaciones de experiencias previas de autogestión en atención primaria (de en otras comunidades o |                                                      |   |   |   |   |                  |

|                                                                                     |  |  |  |  |  |  |
|-------------------------------------------------------------------------------------|--|--|--|--|--|--|
| países)                                                                             |  |  |  |  |  |  |
| Contar con un sistema de asignación y seguimiento presupuestario adecuado           |  |  |  |  |  |  |
| Alcanzar un pacto de todos los partidos políticos sobre la autogestión              |  |  |  |  |  |  |
| Contar con coordinadores del centro de salud capacitados                            |  |  |  |  |  |  |
| Contar con directivos de la administración sanitaria (GAP, IB-Salut...) capacitados |  |  |  |  |  |  |

### Dinamización y liderazgo del proceso de autogestión

Diferentes entidades o grupos pueden contribuir a la puesta en marcha de centros de atención primaria con mayor autonomía de gestión. En el proceso de puesta en marcha de los centros autogestionados, ¿qué importancia cree Ud. que debería tener la contribución de los siguientes grupos?

| Grupo                              | Importancia de su contribución |   |   |   |   |                       |
|------------------------------------|--------------------------------|---|---|---|---|-----------------------|
|                                    | 0<br>(importancia nula)        | 1 | 2 | 3 | 4 | 5<br>(muy importante) |
| Profesionales de atención primaria |                                |   |   |   |   |                       |
| Ciudadanos                         |                                |   |   |   |   |                       |
| Gestores - directivos              |                                |   |   |   |   |                       |
| Políticos                          |                                |   |   |   |   |                       |

¿Qué institución considera que debería liderar el proceso de implantación de centros de salud autogestionados en Mallorca? *(señale sólo una opción)*

| Institución                                | (señale sólo una opción) |
|--------------------------------------------|--------------------------|
| Presidencia del Govern                     |                          |
| Conselleria de Salut                       |                          |
| Servei de Salut – IB-Salut                 |                          |
| Gerència d'Atenció Primària (GAP) Mallorca |                          |

En el proceso de puesta en marcha de los centros de salud autogestionados, ¿qué importancia tendría el apoyo y la contribución de las siguientes entidades?

| Entidad                  | Importancia / contribución |   |   |   |   |                       |
|--------------------------|----------------------------|---|---|---|---|-----------------------|
|                          | 0<br>(nula)                | 1 | 2 | 3 | 4 | 5<br>(muy importante) |
| Colegio de médicos       |                            |   |   |   |   |                       |
| Colegio de enfermería    |                            |   |   |   |   |                       |
| Sindicatos               |                            |   |   |   |   |                       |
| Sociedades científicas * |                            |   |   |   |   |                       |
| Asociaciones ciudadanas  |                            |   |   |   |   |                       |

\* Societat Balear de Medicina de Família, SEMEGEN, SEMG, Associació Balear d'Infermeria Comunitaria...

### Aspectos jurídico-laborales

Desde el punto de vista jurídico-laboral, un centro de atención primaria autogestionado ¿piensa Ud. que debería depender de? (señale sólo una opción)

| Dependencia de                                              | (señale sólo una opción) |
|-------------------------------------------------------------|--------------------------|
| la Administración (GAP – Servei de Salut), como hasta ahora |                          |

|                                                                                                                         |  |
|-------------------------------------------------------------------------------------------------------------------------|--|
| los profesionales. Por ejemplo, en forma de una sociedad limitada profesional o cooperativa (como las EBA en Cataluña). |  |
| de empresas de carácter público (consorcios, fundaciones, empresas públicas...)                                         |  |
| de empresas privadas                                                                                                    |  |

### Disposición y actitud de los profesionales. Transferencia de riesgos

A continuación, indique su opinión sobre su predisposición y actitud, y la de los equipos de atención primaria, para incorporarse a un proceso de autogestión.

| Disposición / actitud                                                                                                                                                      | Sí | No | No lo tengo claro |
|----------------------------------------------------------------------------------------------------------------------------------------------------------------------------|----|----|-------------------|
| ¿Considera que su equipo (del centro de salud) estaría interesado en incorporarse a un proceso de autogestión?                                                             |    |    |                   |
| Independientemente de la situación de su centro, ¿considera que otros centros de salud de Mallorca están capacitados para desarrollar con éxito un proceso de autogestión? |    |    |                   |
| ¿Estaría Ud. interesado/a en incorporarse a un proceso de autogestión?                                                                                                     |    |    |                   |

El concepto de autogestión conlleva, a cambio de participar de las ventajas de un centro con una mayor capacidad de decisión, asumir ciertos riesgos o inconvenientes por parte de los profesionales (transferencia de riesgos). Señale cuál/es estaría dispuesto a asumir en un entorno autogestionado.

| Riesgo                                                                             | ¿Estaría Ud. dispuesto a asumir este riesgo? |    |                   |
|------------------------------------------------------------------------------------|----------------------------------------------|----|-------------------|
|                                                                                    | Sí                                           | No | No lo tengo claro |
| A renunciar al régimen estatutario/funcionarial, para pasar a otro de tipo laboral |                                              |    |                   |
| A cambiar de centro de salud (Zona Básica de Salud)                                |                                              |    |                   |



En relación a la disposición a correr un riesgo económico (posibles ganancias o pérdidas monetarias), según el grado de cumplimiento de los objetivos del centro en un entorno autogestionado, ¿qué porcentaje de sus ingresos totales estaría dispuesto/a a arriesgar?

*(señale sólo una opción)*

| Porcentaje de ingresos a los que estaría dispuesto a arriesgar                             |  |
|--------------------------------------------------------------------------------------------|--|
| Ninguno, 0 %                                                                               |  |
| Aceptaría la posibilidad de tener hasta un 10% de pérdidas / 10 % de beneficios            |  |
| Aceptaría la posibilidad de tener hasta un 20% de pérdidas / 20 % de beneficios            |  |
| Aceptaría la posibilidad de tener hasta un 30% de pérdidas / 30 % de beneficios            |  |
| Aceptaría la posibilidad de tener más de un 30% de pérdidas / más de un 30 % de beneficios |  |

### Formas de puesta en marcha del proyecto

A la hora de poner en marcha un proyecto de autogestión para los centros de salud de Mallorca, ¿cuál de las siguientes formas le parece la más adecuada? *(señale sólo una opción)*

| Formas de puesta en marcha                                                                                                                                                                                   | <i>(señale sólo una opción)</i> |
|--------------------------------------------------------------------------------------------------------------------------------------------------------------------------------------------------------------|---------------------------------|
| Empezar por algún o algunos centros de salud para posteriormente extenderlo a los restantes centros si el resultado es positivo (pilotaje)                                                                   |                                 |
| Comenzar de forma simultánea en todos los centros de Mallorca de la misma forma (con el mismo nivel de autogestión)                                                                                          |                                 |
| Comenzar de forma simultánea en todos los centros de Mallorca, pero delegando o no ciertas competencias a cada centro en función de sus características (diferentes niveles de autogestión para cada centro) |                                 |
| Otra forma <i>(especificar cuál)</i>                                                                                                                                                                         |                                 |

### Datos personales/profesionales

- Centro de salud
- Profesión
- Edad
- Sexo

- Años de experiencia en AP
- ¿Es Ud. integrante del equipo directivo del centro?

Desea Ud. añadir algún comentario. Muchas gracias por su colaboración
